# Supplementary material for: Characterization and expression of the ABC family (G group) in ‘Dangshansuli’ pear (Pyrus bretschneideri Rehd.) and its russet mutant
Source: PubMed Central journal article supplement (PMC5901498; doi:10.1590/1678-4685-gmb-2017-0109), 2018
Supplement: 1415-4757-GMB-41-01-2017-0109-s001.pdf [file 1415-4757-GMB-41-01-2017-0109-s001.pdf]

## Supplementary Material to “Characterization and expression of the ABC family (G group) in ‘Dangshansuli’ pear (*Pyrus bretschneideri* Rehd.) and its russet mutante”

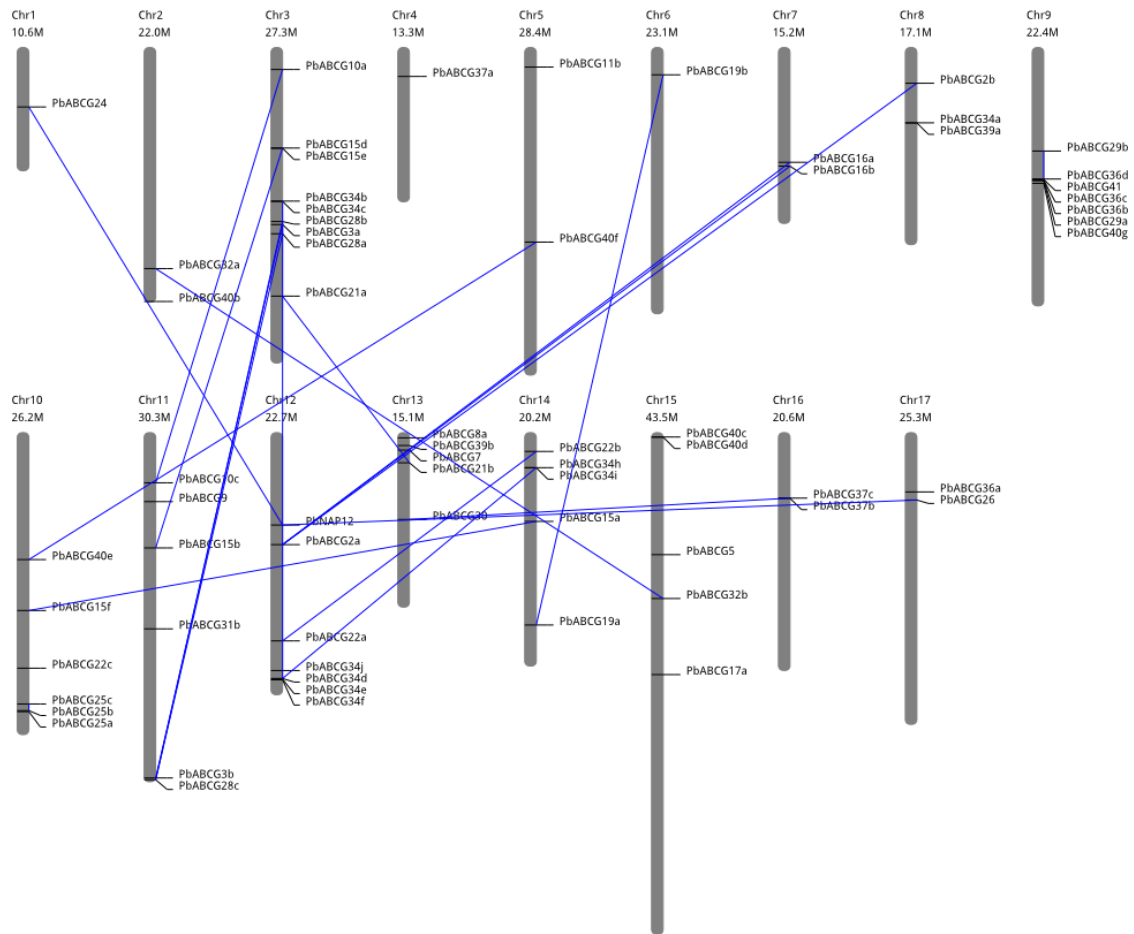

**Figure S1** - Visualization of the *PbABCG* genes mapped onto the different chromosomes in the pear genome. The genes that have significant synteny relationship are linked by blue lines.
