# Supplementary material for: Characterization and expression of the ABC family (G group) in ‘Dangshansuli’ pear (Pyrus bretschneideri Rehd.) and its russet mutant
Source: PubMed Central journal article supplement (PMC5901498; doi:10.1590/1678-4685-gmb-2017-0109), 2018

**Supplementary Material to “Characterization and expression of the ABC family (G group) in ‘Dangshansuli’ pear (*Pyrus bretschneideri* Rehd.) and its russet mutante”**

**Figure S4** - Exons, represented by boxes, were drawn to scale. Lines connecting two exons represent an intron. PF00005 domain (ATP-binding domain of ABC transporters) is marked in red. Intron phases 0, 1 and 2 are indicated by numbers 0, 1 and 2, respectively.

PF00005 ABC transporter

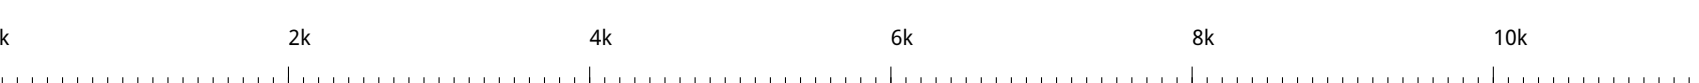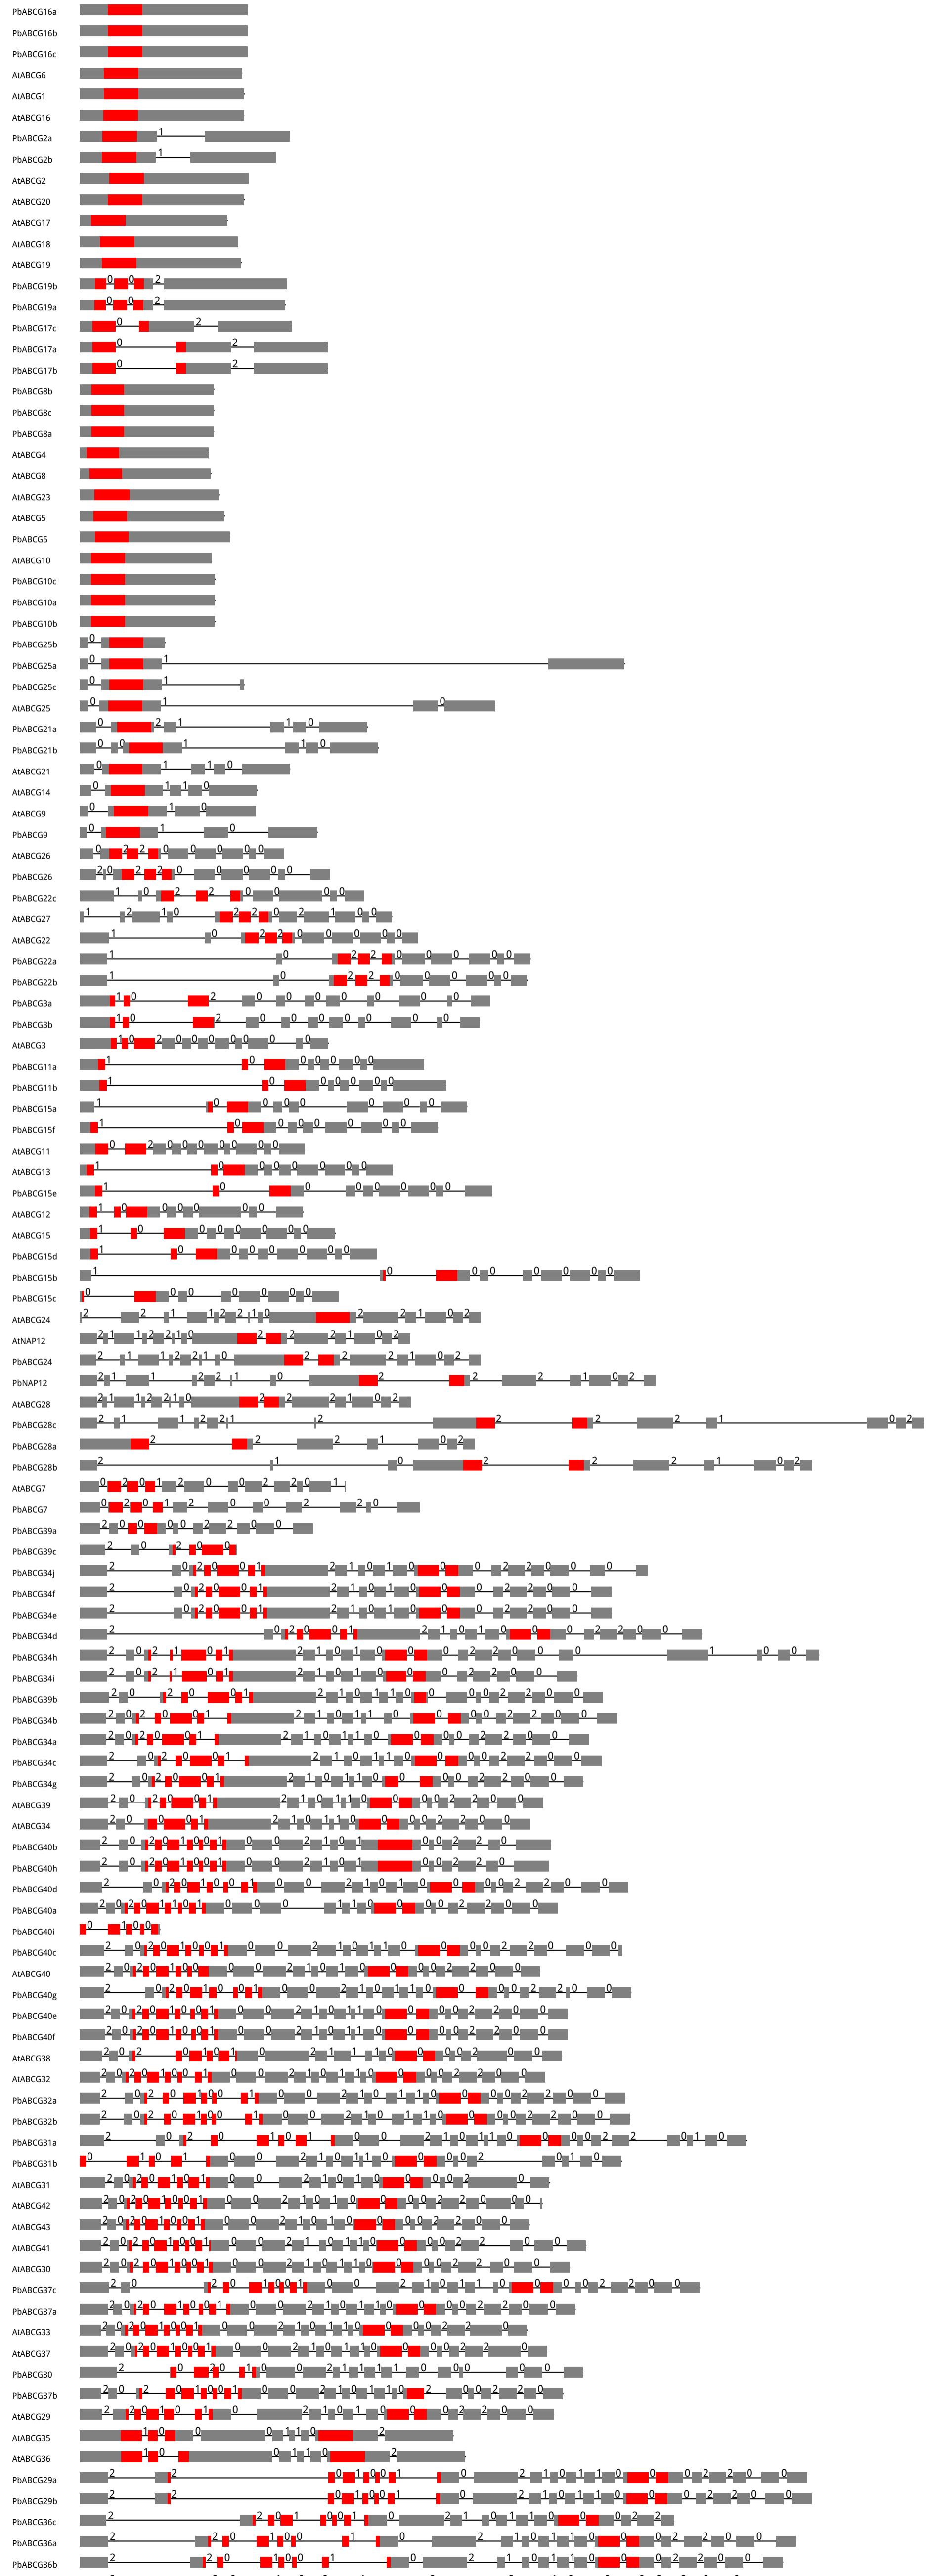

Supplement: 1415-4757-GMB-41-01-2017-0109-s004.pdf [file 1415-4757-GMB-41-01-2017-0109-s004.pdf]
