# Supplementary material for: Characterization and expression of the ABC family (G group) in ‘Dangshansuli’ pear (Pyrus bretschneideri Rehd.) and its russet mutant
Source: PubMed Central journal article supplement (PMC5901498; doi:10.1590/1678-4685-gmb-2017-0109), 2018
Supplement: 1415-4757-GMB-41-01-2017-0109-s005.pdf [file 1415-4757-GMB-41-01-2017-0109-s005.pdf]

**Supplementary Material to “Characterization and expression of the ABC family (G group) in ‘Dangshansuli’ pear (*Pyrus bretschneideri* Rehd.) and its russet mutante”**

**Table S1** - Characteristics of ABCG genes in ‘Dangshansuli’pear.

| Gene ID*1 | Gene ID*2 | Gene ID*3    | Chromosome      | Start    | End      | Strand | Amino acid length | Molecular mass values | Isoelectric point |
|-----------|-----------|--------------|-----------------|----------|----------|--------|-------------------|-----------------------|-------------------|
| PbABCG16a | Pbr026485 | LOC103928588 | Chr7            | 9962090  | 9964617  | +      | 751               | 82.60827              | 9.511             |
| PbABCG16b | Pbr032285 | LOC103948344 | Chr7            | 10296939 | 10299809 | -      | 751               | 82.92444              | 9.1938            |
| PbABCG16c | Pbr038144 | LOC103936749 | scaffold797.0   | 78079    | 81063    | -      | 751               | 82.79962              | 9.6043            |
| PbABCG2a  | Pbr008253 | LOC103933813 | Chr12           | 9725098  | 9727923  | -      | 729               | 81.07879              | 8.8324            |
| PbABCG2b  | Pbr032212 | LOC103932967 | Chr8            | 3097337  | 3099969  | -      | 727               | 81.02604              | 9.7471            |
| PbABCG19b | Pbr028364 | LOC103946918 | Chr6            | 2365307  | 2368093  | +      | 820               | 92.29635              | 9.4259            |
| PbABCG19a | Pbr038838 | LOC103950663 | Chr14           | 16706307 | 16709072 | +      | 809               | 91.02887              | 9.6304            |
| PbABCG17c | Pbr040113 | LOC103937641 | scaffold872.0   | 128804   | 131654   | -      | 743               | 82.88499              | 9.6111            |
| PbABCG17a | Pbr004664 | LOC103954689 | Chr15           | 21011865 | 21015202 | +      | 741               | 82.59777              | 9.7771            |
| PbABCG17b | Pbr013994 | -            | scaffold206.0.1 | 111796   | 115133   | -      | 741               | 82.59272              | 9.7275            |
| PbABCG8b  | Pbr021544 | LOC103966156 | scaffold320.0   | 263873   | 265681   | -      | 602               | 66.9032               | 9.4768            |
| PbABCG8c  | Pbr021545 | LOC103966157 | scaffold320.0   | 307821   | 309629   | +      | 602               | 66.9032               | 9.4768            |
| PbABCG8a  | Pbr010836 | LOC103958197 | Chr13           | 450434   | 452500   | +      | 601               | 66.96141              | 9.6175            |
| PbABCG5   | Pbr027932 | LOC103946773 | Chr15           | 10596952 | 10599306 | +      | 672               | 74.8078               | 8.4667            |

| Gene ID*1 | Gene ID*2 | Gene ID*3    | Chromosome      | Start    | End      | Strand | Amino acid length | Molecular mass values | Isoelectric point |
|-----------|-----------|--------------|-----------------|----------|----------|--------|-------------------|-----------------------|-------------------|
| PbABCG10c | Pbr038226 | LOC103932334 | Chr11           | 4353494  | 4355320  | -      | 608               | 68.14403              | 9.5386            |
| PbABCG10a | Pbr025834 | LOC103927933 | Chr3            | 1903836  | 1905662  | -      | 608               | 68.23977              | 8.9369            |
| PbABCG10b | Pbr034373 | LOC103934278 | scaffold640.0   | 102783   | 104609   | -      | 608               | 68.35698              | 8.9604            |
| PbABCG25b | Pbr018258 | LOC103964120 | Chr10           | 24137240 | 24138392 | -      | 324               | 35.11167              | 8.6725            |
| PbABCG25a | Pbr018263 | LOC103964121 | Chr10           | 24229617 | 24236942 | +      | 654               | 72.20918              | 8.8721            |
| PbABCG25c | Pbr040133 | LOC103937713 | Chr10           | 23562926 | 23565139 | +      | 331               | 35.91257              | 9.0149            |
| PbABCG21a | Pbr013231 | LOC103946921 | Chr3            | 21585996 | 21589869 | +      | 671               | 74.92667              | 8.4923            |
| PbABCG21b | Pbr027509 | LOC103929216 | Chr13           | 2614521  | 2618538  | +      | 715               | 79.27768              | 9.0629            |
| PbABCG9   | Pbr022331 | LOC103966992 | Chr11           | 5988460  | 5991656  | -      | 622               | 69.06952              | 9.9739            |
| PbABCG26  | Pbr008669 | LOC103956915 | Chr17           | 5852280  | 5855641  | -      | 702               | 79.85684              | 8.5218            |
| PbABCG22c | Pbr039401 | LOC103951205 | Chr10           | 20455656 | 20459471 | +      | 768               | 85.45994              | 9.4418            |
| PbABCG22a | Pbr001309 | LOC103952710 | Chr12           | 18083454 | 18089510 | +      | 747               | 82.54539              | 7.425             |
| PbABCG22b | Pbr010296 | LOC103940192 | Chr14           | 1630091  | 1637121  | +      | 747               | 82.5666               | 9.0645            |
| PbABCG3a  | Pbr019006 | LOC103964822 | Chr3            | 15369227 | 15374741 | +      | 711               | 78.69554              | 9.1112            |
| PbABCG3b  | Pbr030340 | LOC103947696 | Chr11           | 29988477 | 29993847 | +      | 711               | 78.74341              | 8.5371            |
| PbABCG11a | Pbr028447 | LOC103930284 | scaffold471.0.1 | 112346   | 117172   | +      | 686               | 75.77933              | 8.2085            |
| PbABCG11b | Pbr037888 | LOC103936479 | Chr5            | 1691307  | 1696372  | -      | 702               | 77.52573              | 8.875             |
| PbABCG15a | Pbr002037 | LOC103953191 | Chr14           | 7707051  | 7712257  | +      | 677               | 75.2243               | 8.6908            |
| PbABCG15f | Pbr030433 | LOC103931653 | Chr10           | 15446359 | 15451172 | +      | 689               | 76.16238              | 8.6763            |
| PbABCG15e | Pbr017197 | LOC103963798 | Chr3            | 8744863  | 8750399  | +      | 703               | 78.59418              | 9.4782            |
| PbABCG15d | Pbr017196 | LOC103963796 | Chr3            | 8724218  | 8728740  | -      | 686               | 76.17321              | 9.2774            |
| PbABCG15b | Pbr006928 | LOC103955899 | Chr11           | 10009835 | 10017362 | -      | 659               | 73.47338              | 9.1699            |
| PbABCG15c | Pbr007063 | LOC103942099 | scaffold1396.0  | 2541     | 10059    | -      | 598               | 67.2274               | 9.2846            |
| PbABCG24  | Pbr010690 | LOC103958377 | Chr1            | 5157531  | 5162913  | +      | 1110              | 122.78105             | 8.3614            |
| PbNAP12   | Pbr020543 | LOC103965465 | Chr12           | 8021418  | 8029147  | -      | 1115              | 124.02108             | 9.3218            |
| PbABCG28c | Pbr030327 | LOC103947686 | Chr11           | 30144933 | 30156266 | +      | 1068              | 118.0247              | 9.1037            |

| Gene ID*1 | Gene ID*2 | Gene ID*3    | Chromosome     | Start    | End      | Strand | Amino acid length | Molecular mass values | Isoelectric point |
|-----------|-----------|--------------|----------------|----------|----------|--------|-------------------|-----------------------|-------------------|
| PbABCG28a | Pbr008372 | LOC103956733 | Chr3           | 16170117 | 16175423 | -      | 814               | 90.16358              | 9.6404            |
| PbABCG28b | Pbr018986 | LOC103964811 | Chr3           | 15105291 | 15115120 | -      | 938               | 103.92426             | 9.4063            |
| PbABCG7   | Pbr028734 | LOC103947048 | Chr13          | 1517381  | 1521945  | +      | 729               | 79.42906              | 6.7224            |
| PbABCG39a | Pbr001652 | -            | Chr8           | 6543498  | 6546626  | -      | 650               | 74.67133              | 7.292             |
| PbABCG39c | Pbr009350 | LOC103942676 | scaffold1599.0 | 18512    | 20623    | +      | 346               | 38.50228              | 7.3033            |
| PbABCG34j | Pbr017806 | LOC103963646 | Chr12          | 20658693 | 20666315 | +      | 1483              | 167.51098             | 7.8756            |
| PbABCG34f | Pbr005538 | LOC103955219 | Chr12          | 21459427 | 21466570 | -      | 1452              | 164.01298             | 7.7856            |
| PbABCG34e | Pbr005535 | LOC103955214 | Chr12          | 21404319 | 21411462 | -      | 1452              | 163.98493             | 7.6774            |
| PbABCG34d | Pbr005533 | LOC103955211 | Chr12          | 21348046 | 21356404 | -      | 1452              | 164.47316             | 8.0471            |
| PbABCG34h | Pbr016785 | LOC103944282 | Chr14          | 3040552  | 3050484  | +      | 1741              | 196.93989             | 8.9798            |
| PbABCG34i | Pbr016786 | LOC103944283 | Chr14          | 3051645  | 3058330  | +      | 1436              | 162.821               | 7.4166            |
| PbABCG39b | Pbr028690 | LOC103947005 | Chr13          | 1115167  | 1122193  | -      | 1435              | 162.74258             | 7.1314            |
| PbABCG34b | Pbr004829 | LOC103954767 | Chr3           | 13333149 | 13340368 | -      | 1439              | 163.08598             | 7.8988            |
| PbABCG34a | Pbr001651 | LOC103939731 | Chr8           | 6533506  | 6540345  | +      | 1439              | 163.09301             | 8.1943            |
| PbABCG34c | Pbr004830 | LOC103954769 | Chr3           | 13361557 | 13369970 | -      | 1448              | 164.54954             | 8.6291            |
| PbABCG34g | Pbr009349 | LOC103942675 | scaffold1599.0 | 7443     | 14208    | +      | 1412              | 160.18972             | 6.6754            |
| PbABCG40b | Pbr003177 | LOC103953954 | Chr2           | 22050550 | 22056876 | +      | 1387              | 155.80633             | 7.6464            |
| PbABCG40h | Pbr038066 | -            | scaffold793.0  | 68780    | 75079    | -      | 1387              | 155.70927             | 7.6463            |
| PbABCG40d | Pbr025435 | LOC103927579 | Chr15          | 389353   | 396711   | +      | 1424              | 160.90258             | 7.4162            |
| PbABCG40a | Pbr001472 | LOC103939592 | scaffold1034.0 | 16920    | 23335    | +      | 1313              | 147.77555             | 7.8954            |
| PbABCG40i | Pbr003545 | -            | scaffold1154.0 | 10383    | 11466    | +      | 164               | 18.0208               | 6.2408            |
| PbABCG40c | Pbr025434 | LOC103927580 | Chr15          | 376796   | 384077   | +      | 1489              | 167.95495             | 6.9393            |
| PbABCG40g | Pbr036064 | LOC103935388 | Chr9           | 11789544 | 11796953 | +      | 1403              | 158.70627             | 8.286             |
| PbABCG40e | Pbr025876 | LOC103927975 | Chr10          | 11022941 | 11029493 | -      | 1433              | 161.78225             | 8.2975            |
| PbABCG40f | Pbr032922 | LOC103959952 | Chr5           | 16893516 | 16900391 | -      | 1437              | 162.51382             | 8.207             |
| PbABCG32a | Pbr014071 | LOC103960664 | Chr2           | 19194068 | 19201662 | -      | 1419              | 161.47333             | 8.14              |

| Gene ID*1 | Gene ID*2 | Gene ID*3    | Chromosome     | Start    | End      | Strand | Amino acid length | Molecular mass values | Isoelectric point |
|-----------|-----------|--------------|----------------|----------|----------|--------|-------------------|-----------------------|-------------------|
| PbABCG32b | Pbr016988 | LOC103962994 | Chr15          | 14404542 | 14411931 | -      | 1419              | 161.86876             | 8.2874            |
| PbABCG31a | Pbr000915 | LOC103939227 | scaffold1001.0 | 56375    | 65331    | -      | 1425              | 159.36746             | 8.9576            |
| PbABCG31b | Pbr014244 | LOC103960748 | Chr11          | 17037831 | 17045112 | -      | 1169              | 130.49761             | 8.6441            |
| PbABCG37c | Pbr037759 | LOC103950309 | Chr16          | 5685119  | 5693451  | +      | 1453              | 162.73119             | 7.5095            |
| PbABCG37a | Pbr006706 | LOC103955857 | Chr4           | 2507891  | 2514551  | +      | 1447              | 163.21637             | 7.7184            |
| PbABCG30  | Pbr018550 | -            | Chr13          | 7536596  | 7543357  | +      | 1121              | 126.65135             | 7.2904            |
| PbABCG37b | Pbr037758 | LOC103950308 | Chr16          | 5694535  | 5701031  | -      | 1312              | 147.92073             | 8.3915            |
| PbABCG29a | Pbr019117 | LOC103944887 | Chr9           | 11553815 | 11563586 | +      | 1491              | 168.71149             | 9.1999            |
| PbABCG29b | Pbr034728 | LOC103934504 | Chr9           | 8987632  | 8997462  | +      | 1491              | 168.7225              | 9.0899            |
| PbABCG36c | Pbr019121 | LOC103944819 | Chr9           | 11493113 | 11501097 | +      | 1315              | 148.11402             | 8.4988            |
| PbABCG36a | Pbr002804 | LOC103940188 | Chr17          | 5147340  | 5156962  | -      | 1497              | 169.14559             | 8.8634            |
| PbABCG36b | Pbr019119 | LOC103944820 | Chr9           | 11518741 | 11528189 | +      | 1477              | 166.67536             | 8.0263            |
| PbABCG41  | Pbr019123 | LOC103944818 | Chr9           | 11450160 | 11459482 | +      | 1346              | 152.6126              | 8.6243            |
| PbABCG36d | Pbr019124 | LOC103944817 | Chr9           | 11416121 | 11426132 | +      | 1497              | 169.28749             | 7.9394            |

\*1: Gene nameL; \*2: Gene ID: Pbr\_v1.0 (<http://peargenome.njau.edu.cn>); \*3: Gene locus in NCBI ; MW: molecular weight; IP: Isoelectric point; *E*-value: *E*-value of InterProSca
