# Supplementary material for: Characterization and expression of the ABC family (G group) in ‘Dangshansuli’ pear (Pyrus bretschneideri Rehd.) and its russet mutant
Source: PubMed Central journal article supplement (PMC5901498; doi:10.1590/1678-4685-gmb-2017-0109), 2018
Supplement: 1415-4757-GMB-41-01-2017-0109-s006.pdf [file 1415-4757-GMB-41-01-2017-0109-s006.pdf]

**Supplementary Material to “Characterization and expression of the ABC family (G group) in ‘Dangshansuli’ pear (*Pyrus bretschneideri* Rehd.) and its russet mutante”**

**Table S2** - Primer sequences for the ABCG genes in the exocarps of ‘Dangshansuli’ and russet mutant pear.

| Primer names | Base sequence (5' to 3')        |
|--------------|---------------------------------|
| ABCG4-1R     | TTCAACCTATTTTCATTTAGTATTTATCGA  |
| ABCG4-1F     | AGGTGGACTAATATCTACATCCTGCTA     |
| ABCG4-2F     | GTTTTTCGTGTTCTATCGTGTGCT        |
| ABCG4-2R     | TTCATATTTGACTTTAGTTGACTACTTCTTT |
| ABCG5F       | GGAGGTGTATGGTGACGGGA            |
| ABCG5R       | CATACAATTACTAGTTAAAGAAAAGGAGGT  |

---

| Primer names | Base sequence (5' to 3') |
|--------------|--------------------------|
| ABCG6R       | AGCAACAAGGCAAAGTAAAACAG  |
| ABCG6F       | AGCAGGGAGTGACGGACTTGAG   |
| ABCG11F      | GTCAATGCCTACCAAGCGAAAC   |
| ABCG11R      | ACATAAGGAGAAGCATTGGGGT   |
| ABCG14F      | GAATACCAACGGTGATGGACTG   |
| ABCG14R      | CTGATGATCGGTTGGCGTACT    |
| ABCG15F      | GCCGGTGTTCAGTCACTCT      |
| ABCG15R      | TACTCAGTCCTGCAATGCCTC    |
| ABCG20F      | GACAACTCACCCTAGGAGCC     |
| ABCG20R      | AAGAACCCCAAAGCAATGGTGA   |
| ABCG21F      | TGGGAGTGCAATACTCGGTG     |
| ABCG21R      | GAGGTTGCCCCATCCTCAAT     |

---

---

| Primer names | Base sequence (5' to 3') |
|--------------|--------------------------|
| ABCG32F      | TAGCCGGCATTATGGTGGTC     |
| ABCG32R      | CCCAGAACTGAAGCAATGTGG    |
| ABCG35F      | GATATGTCCCGTGGCATGGA     |
| ABCG35R      | TGAAGGCGAAGAAGACTCCG     |

---
