# Supplementary material for: Characterization and expression of the ABC family (G group) in ‘Dangshansuli’ pear (Pyrus bretschneideri Rehd.) and its russet mutant
Source: PubMed Central journal article supplement (PMC5901498; doi:10.1590/1678-4685-gmb-2017-0109), 2018
Supplement: 1415-4757-GMB-41-01-2017-0109-s007.pdf [file 1415-4757-GMB-41-01-2017-0109-s007.pdf]

**Supplementary Material to “Characterization and expression of the ABC family (G group) in ‘Dangshansuli’ pear (*Pyrus bretschneideri* Rehd.) and its russet mutante”**

**Table S3-** Synteny and Ka/Ks related to genes in ABC G subfamily in ‘Dangshansuli’ pear.

| Pair of gene              | Anchors | <i>E</i> value | Ka   | Ks   | Ka/Ks |
|---------------------------|---------|----------------|------|------|-------|
| PbABCG19b vs<br>PbABCG19a | 47      | 1.96E-093      | 0.04 | 0.2  | 0.22  |
| PbABCG32a vs<br>PbABCG32b | 40      | 1.32E-076      | 0.04 | 0.16 | 0.23  |
| PbABCG21a vs<br>PbABCG21b | 32      | 2.84E-066      | 0.06 | 0.19 | 0.3   |
| PbABCG34h vs<br>PbABCG34d | 30      | 5.52E-060      | 0.06 | 0.2  | 0.28  |
| PbABCG22b vs<br>PbABCG22a | 24      | 1.69E-051      | 0.04 | 0.15 | 0.29  |
| PbABCG8a vs<br>PbABCG8b   | 23      | 4.54E-041      | 0.04 | 0.22 | 0.17  |
| PbABCG16b vs<br>PbABCG16c | 16      | 7.09E-025      | 0.03 | 0.43 | 0.07  |
| PbABCG31a vs<br>PbABCG31b | 15      | 6.69E-027      | 0    | 0.01 | 0.17  |
| PbABCG25c vs<br>PbABCG25b | 15      | 2.08E-029      | 0.03 | 0.05 | 0.7   |
| PbABCG16a vs<br>PbABCG16c | 14      | 1.71E-019      | 0.03 | 0.42 | 0.07  |
| PbABCG40f vs<br>PbABCG40e | 13      | 6.32E-028      | 0.04 | 0.14 | 0.26  |
| PbABCG10a vs<br>PbABCG10c | 11      | 1.85E-024      | 0.06 | 0.14 | 0.41  |
| PbABCG10c vs<br>PbABCG10b | 10      | 4.11E-019      | 0.06 | 0.15 | 0.36  |
| PbABCG3a vs<br>PbABCG3b   | 9       | 5.18E-013      | 0.03 | 0.15 | 0.23  |

| Pair of gene              | Anchors | <i>E</i> value | Ka   | Ks   | Ka/Ks |
|---------------------------|---------|----------------|------|------|-------|
| PbABCG11b vs<br>PbABCG11a | 9       | 5.37E-017      | 0.05 | 0.16 | 0.3   |
| PbABCG29b vs<br>PbABCG36d | 9       | 1.09E-022      | 0.13 | 0.48 | 0.26  |
| PbABCG37c vs<br>PbABCG30  | 9       | 3.70E-018      | 0.33 | 1.63 | 0.2   |
| PbABCG16a vs<br>PbABCG2a  | 8       | 4.12E-012      | 0.2  | 4.64 | 0.04  |
| PbABCG16b vs<br>PbABCG2a  | 8       | 2.86E-011      | 0.2  | 4.65 | 0.04  |
| PbABCG2b vs<br>PbABCG2a   | 7       | 1.06E-015      | 0.05 | 0.17 | 0.27  |
| PbABCG15d vs<br>PbABCG15b | 6       | 1.05E-009      | 0.04 | 0.19 | 0.21  |
| PbABCG28b vs<br>PbABCG28c | 6       | 1.27E-008      | 0.08 | 0.21 | 0.39  |
| PbABCG28a vs<br>PbABCG28c | 5       | 2.76E-008      | 0.05 | 0.17 | 0.31  |
| PbABCG28b vs<br>PbABCG28a | 4       | 2.05E-008      | 0    | 0    | 2.38  |
| PbABCG17b vs<br>PbABCG17a | 4       | 1.21E-007      | 0.01 | 0.01 | 0.51  |
| PbABCG15a vs<br>PbABCG15f | 4       | 3.65E-008      | 0.06 | 0.26 | 0.25  |
| PbABCG24 vs PbNAP12       | 3       | 1.14E-004      | 0.27 | 2.19 | 0.12  |
| PbABCG10a vs<br>PbABCG10b | 3       | 1.60E-005      | 0.01 | 0.01 | 0.78  |
| PbABCG34b vs<br>PbABCG34d | 3       | 2.17E-003      | 0.16 | 1.33 | 0.12  |
| PbABCG26 vs PbNAP12       | 3       | 4.66E-005      | 1.04 | 3.16 | 0.33  |
| PbABCG15b vs<br>PbABCG15c | 3       | 9.80E-005      | 0    | 0.01 | 0.32  |
| PbABCG2a vs<br>PbABCG16c  | 3       | 1.78E-004      | 0.19 | 4.62 | 0.04  |
